# Supplementary material for: Exploring factors associated with healthcare professionals’ subjective perceptions of complex issues in primary care in Japan: a self-administered survey study on confidence, satisfaction and burden levels
Source: HighWire-hosted journal article supplement (doi:10.1136/bmjopen-2023-081328), 2024-03-01
Supplement: bmjopen-2023-081328supp001_data_supplement.pdf [file bmjopen-2023-081328supp001_data_supplement.pdf]

## Web Survey (English)

1) Reflecting on your usual interactions with multi-healthcare professionals in your current organization, please select the number that best applies to each of the following questions.

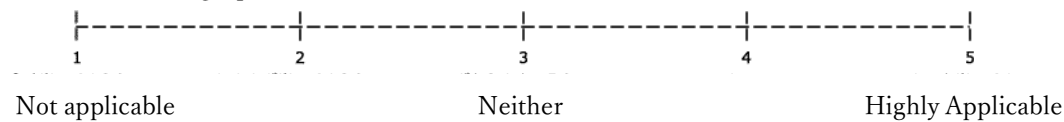

\*Other professions refer to professions other than one's own, and multi-healthcare professionals refers to various professions, including one's own.

## Domain 1: Patient, client, family and community centered

- |                                                                                                                                                                     |
|---------------------------------------------------------------------------------------------------------------------------------------------------------------------|
| 1. I regularly convey the concepts of values and concerns of the patients/clients/their families to multi-healthcare professionals.                                 |
| 2. I discuss the goals of therapeutic interventions and healthcare focused on patients/clients/their families with multi-healthcare professionals.                  |
| 3. I share what I have communicated to patients/clients/their families with multi-healthcare professionals involved in the therapeutic intervention and healthcare. |

## Domain 2: Interprofessional Communication

- |                                                                                                                                                                                                 |
|-------------------------------------------------------------------------------------------------------------------------------------------------------------------------------------------------|
| 4. I regularly convey information that I have come to acquire to multi-healthcare professionals.                                                                                                |
| 5. When I answer and ask questions with patients/clients/their families, I pay due respect to multi-healthcare professionals for their roles and opinions (including non-verbal communication). |
| 6. I explain my own views and opinions in terms clearly understandable to other professionals.                                                                                                  |

## Domain 3: Fulfill the role of the profession.

- |                                                                                                          |
|----------------------------------------------------------------------------------------------------------|
| 7. I convey my general knowledge and concept of values to other professions.                             |
| 8. I fulfil my responsibility among multi- healthcare professionals in the care of patients and clients. |
| 9. I fill the role and functions requested of me by multi-healthcare professionals.                      |

## Domain 4: Working on Relationships

- |                                                                                                               |
|---------------------------------------------------------------------------------------------------------------|
| 10. I have an equal relationship with multi-healthcare professionals.                                         |
| 11. I feel I am growing together with multi-healthcare professionals.                                         |
| 12. I am careful about not causing situations of interpersonal conflicts with multi-healthcare professionals. |

## Domain 5: Reflecting on one's own occupation

- |                                                                                                          |
|----------------------------------------------------------------------------------------------------------|
| 13. I understand the role and functions expected of me by multi-healthcare professionals.                |
| 14. I understand the role and functions I am to perform at the facility where I serve as a staff member. |
| 15. I understand that my actions may affect other professionals.                                         |

## Domain 6: Understanding other professions

|                                                                                                                 |
|-----------------------------------------------------------------------------------------------------------------|
| 16. I understand the role and functions of other professionals at the facility where I serve as a staff member. |
|-----------------------------------------------------------------------------------------------------------------|

|                                                                               |
|-------------------------------------------------------------------------------|
| 17. I understand the concept of values that other professionals tend to have. |
|-------------------------------------------------------------------------------|

|                                                                             |
|-----------------------------------------------------------------------------|
| 18. I understand the work environment in which other professionals operate. |
|-----------------------------------------------------------------------------|

2) For the following 1-20 items, be sure to choose one from 1, 2, 3, 4, or 5 and select the appropriate number.

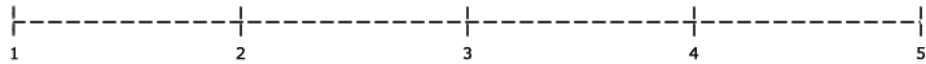

Strongly disagree

Neither

Strong agree

|                                                                                       |
|---------------------------------------------------------------------------------------|
| 1. Staff members appear to be willing to do whatever it takes to fulfill their roles. |
|---------------------------------------------------------------------------------------|

|                                                                                         |
|-----------------------------------------------------------------------------------------|
| 2. There is a strict requirement to follow the organization's policies and regulations. |
|-----------------------------------------------------------------------------------------|

|                                    |
|------------------------------------|
| 3. The staff does a very good job. |
|------------------------------------|

|                                                                                   |
|-----------------------------------------------------------------------------------|
| 4. Managers (department heads and section managers) may scold, but rarely praise. |
|-----------------------------------------------------------------------------------|

|                                                                    |
|--------------------------------------------------------------------|
| 5. What must be done that day is explained to the staff in detail. |
|--------------------------------------------------------------------|

|                                                                                  |
|----------------------------------------------------------------------------------|
| 6. If the work is not done immediately, something is likely to be said about it. |
|----------------------------------------------------------------------------------|

|                                                              |
|--------------------------------------------------------------|
| 7. The agenda for the meeting is well organized and general. |
|--------------------------------------------------------------|

|                                                                                 |
|---------------------------------------------------------------------------------|
| 8. There is a tendency in organizations to ignore the existence of individuals. |
|---------------------------------------------------------------------------------|

|                                                                            |
|----------------------------------------------------------------------------|
| 9. The attention and guidance of middle management extends to the details. |
|----------------------------------------------------------------------------|

|                                                             |
|-------------------------------------------------------------|
| 10. The manager is rather constantly checking on the staff. |
|-------------------------------------------------------------|

|                                                                    |
|--------------------------------------------------------------------|
| 11. The results of the meeting are always applied to the next job. |
|--------------------------------------------------------------------|

|                                                                                               |
|-----------------------------------------------------------------------------------------------|
| 12. Many staff members consider organizational traditions and customs to be quite compulsory. |
|-----------------------------------------------------------------------------------------------|

|                                                   |
|---------------------------------------------------|
| 13. Each employee has important responsibilities. |
|---------------------------------------------------|

|                                                                                |
|--------------------------------------------------------------------------------|
| 14. Be able to express his/her opinion without the supervision of the manager. |
|--------------------------------------------------------------------------------|

|                                                             |
|-------------------------------------------------------------|
| 15. Managers always try to treat their subordinates fairly. |
|-------------------------------------------------------------|

|                                                             |
|-------------------------------------------------------------|
| 16. Employees are granted the freedom to do as they please. |
|-------------------------------------------------------------|

|                                           |
|-------------------------------------------|
| 17. The organization is very interesting. |
|-------------------------------------------|

|                                                                    |
|--------------------------------------------------------------------|
| 18. The manager tries to integrate himself/herself into the staff. |
|--------------------------------------------------------------------|

|                                                                                 |
|---------------------------------------------------------------------------------|
| 19. Few people in the organization are willing to work on their own initiative. |
|---------------------------------------------------------------------------------|

|                                                           |
|-----------------------------------------------------------|
| 20. Staff members always feel pressured to do their jobs. |
|-----------------------------------------------------------|

3) We would like to ask you about the response to complex healthcare issues in your area or facility. Where would you place your confidence/satisfaction/level of burden in responding to the complex healthcare issues you are currently facing?

Confidence level:

Not at all confident \_\_\_\_\_ Very confident

Satisfaction:

Not satisfied at all \_\_\_\_\_ Very satisfied

Burden Level:

Very burdensome \_\_\_\_\_ Not burdensome at all

Tell us about yourself.

4) What is your age? ( ) years

5) What is your gender? Male Female

6) What is your facility affiliation?

University hospitals, Hospitals with over 500 beds, Hospitals with 100-499 beds, Hospitals with 20-99 beds, Clinics with beds, Clinics without beds, Visiting nurse stations, Community comprehensive support centers, Health centers, Long-term care medical facilities (hospitals), Long-term care medical facilities (clinics), Long-term care health facilities for the elderly, Welfare facilities for the elderly, Helper stations, Government (not including community comprehensive support centers and health centers) Elementary/Junior high schools/High schools, Universities, Others (free answers)

7) What is the location (prefecture) of your institution?

8) What is your job title?

Physician, Public health nurse/nurse, Pharmacist, Dentist, Dental hygienist, Physical therapist, Occupational therapist, Speech therapist, Radiologic technologist, Clinical technologist, Long-term care support specialist, Social worker, Psychologist, Dietitian, Psychiatric social worker, Care worker, Other (free text)

9) How many years of professional experience do you have? Please include periods of maternity leave and other leaves of absence. ( ) years

10) How long have you been employed at the hospital/clinic/facility to which you currently belong? Please include periods of leave such as maternity leave. ( ) years

11) What type of work do you do at your current place of employment? Full-time, Part-time

12) Please indicate whether or not you have experience in administrative duties (coordinating staff work, managing personnel, etc.) in your current workplace. Yes No

13) Please indicate whether or not you have received interprofessional education at a university or training school. Yes No

14) Please tell us whether you have had any experience with interprofessional education in your organization or community (e.g., case study meetings, community comprehensive care meetings, etc.). Yes No

## Web 調査票（日本語）

1)あなたが現在所属している組織での普段の多職種との関わりを振り返り、下記の各質問について、最も当てはまる数字を選択して下さい。

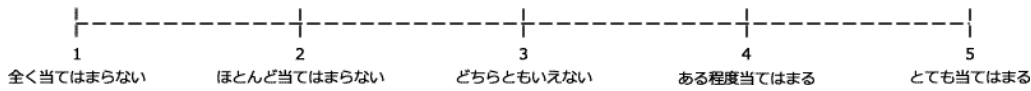

\*他職種は自分以外の職種を、多職種は自らの職種を含めた様々な職種のことを意味しております。

## ドメイン 1：患者・利用者・家族・コミュニティ中心

- |                                               |
|-----------------------------------------------|
| 1. 私は、自分が把握している患者・利用者・家族の価値観や関心事を、多職種に伝えている。  |
| 2. 私は患者・利用者・家族を中心とした治療やケアの目標を多職種と話し合っている。     |
| 3. 私は患者・利用者・家族に伝えた内容について、治療やケアに関わる多職種と共有している。 |

## ドメイン 2：職種間コミュニケーション

- |                                                    |
|----------------------------------------------------|
| 4. 私は自職種が把握している情報を、多職種に伝えている。                      |
| 5. 私は多職種の役割や意見を尊重した返答または問いかけをしている。（非言語コミュニケーション含む） |
| 6. 私は自職種の見解を、他職種にも理解できる言葉で説明している。                  |

## ドメイン 3：職種としての役割を全うする

- |                                      |
|--------------------------------------|
| 7. 私は自職種がもつ一般的な知識や価値観を、他職種に伝えている。    |
| 8. 私は患者・利用者に対して、多職種の中で自職種の役割を果たしている。 |
| 9. 私は多職種から求められる自職種の役割を担っている。         |

## ドメイン 4：関係性に働きかける

- |                         |
|-------------------------|
| 10. 私は多職種と対等な関係を作っている。  |
| 11. 私は多職種と一緒に成長している。    |
| 12. 私は多職種との対人葛藤を予防している。 |

## ドメイン 5：自職種を省みる

- |                               |
|-------------------------------|
| 13. 私は多職種が期待する自職種の役割を理解している。  |
| 14. 私は自施設における自職種の役割を理解している。   |
| 15. 私は他職種に影響しうる自職種の行動を理解している。 |

## ドメイン 6：他職種を理解する

- |                               |
|-------------------------------|
| 16. 私は自施設における他職種の役割を理解している。   |
| 17. 私は他職種が持ちやすい価値観について理解している。 |
| 18. 私は他職種が働く職場環境について理解している。   |

2) 次の 1～20 間について、1, 2, 3, 4, 5 の中から必ず 1 つ選び、該当する番号を選択して下さい。

1-----2-----3-----4-----5  
 全くそう思わない      あまりそう思わない      どちらともいえない      ややそう思う      とてもそう思う

|                                        |
|----------------------------------------|
| 1. 職員には、何が何でも自分の役割を果たそうとする姿勢が見受けられる。   |
| 2. 組織の方針や規則に従うように、厳しい要請がある。            |
| 3. 職員はたいへんよく仕事をしている。                   |
| 4. 管理者（部長、課長）は叱ることはあってもほめることはまれである。    |
| 5. その日に行わなければならないことは、詳細な点まで職員に説明されている。 |
| 6. 仕事はすぐにやらないと、何か言われそうである。             |
| 7. ミーティングの議題は、よく整理され全般に及んでいる。          |
| 8. 組織には、個人の存在を無視するような風潮がある。            |
| 9. 中間管理職の注意や指導は、詳細な点まで及んでいる。           |
| 10. 管理者は、どちらかといえば絶えず職員をチェックしている。       |
| 11. ミーティングの成果は、必ず次の仕事に生かされている。         |
| 12. 組織の伝統や習慣は、かなり強制的なものと考えている職員が多い。    |
| 13. 職員には、それぞれ重要な責任がもたされている。            |
| 14. 管理者にきがねなく、自分の意見を述べることができる。         |
| 15. 管理者は、常に部下を公平に扱おうとしている。             |
| 16. 職員には、好きなようにする自由が認められている。           |
| 17. 組織は大変おもしろい。                        |
| 18. 管理者は、自ら職員にとけ込もうとしている。              |
| 19. 組織には、自ら進んで仕事をしようとする者は少ない。          |
| 20. 職員は仕事をする上で、いつも圧迫を感じている。            |

3) あなたが所属している地域あるいは施設での複雑な問題への対応についてお聞きします。あなたが今感じている複雑な問題への対応についての自信度・満足度・負担度はどの位置にありますか？

自信度：

全く自信がない \_\_\_\_\_ とても自信がある

満足度：

全く満足していない \_\_\_\_\_ とても満足している

負担度：

とても負担が大きい \_\_\_\_\_ 全く負担はない

あなたのことについて教えてください。

4) 年齢を教えてください。( ) 歳

5) 性別を教えてください。 男性 女性

6) 所属している施設を教えてください。

大学病院、500床以上の病院、100-499床の病院、20-99床の病院、有床診療所、無床診療所、訪問看護ステーション、地域包括支援センター、保健センター、介護療養型医療施設（病院）、介護療養型医療施設（診療所）、介護老人保健施設、介護老人福祉施設、ヘルパーステーション、行政（地域包括支援センターや保健センターを含まない）、小・中・高等学校、大学、その他（自由記載）

7) 所属している施設の所在地（都道府県）を教えてください。

8) 職種 を教えてください。

医師 保健師・看護師 薬剤師 歯科医 歯科衛生士 理学療法士

作業療法士 言語聴覚士 放射線技師 臨床検査技師 介護支援専門員

社会福祉士 心理職 管理栄養士 精神保健福祉士 介護福祉士

その他（自由記載）

9) 専門職としての経験年数を教えてください。※産休などの休職期間なども含めて、記載して下さい。( ) 年

10) 現在所属している病院・診療所・施設等への勤続年数を教えてください。※産休などの休職期間なども含めて、記載して下さい。( ) 年

11) 今の職場での勤務形態を教えてください。

常勤 非常勤

12) 今の職場での管理業務（職員の業務の調整、人事管理など）の経験の有無を教えてください。

あり なし

13) 大学や養成校で多職種連携教育を受けた経験の有無を教えてください。

あり なし

14) 組織や地域で多職種連携教育を受けた経験の有無（事例検討会や地域包括ケア会議など）を教えてください。

あり なし
