# Supplementary material for: Exploring factors associated with healthcare professionals’ subjective perceptions of complex issues in primary care in Japan: a self-administered survey study on confidence, satisfaction and burden levels
Source: HighWire-hosted journal article supplement (doi:10.1136/bmjopen-2023-081328), 2024-03-01
Supplement: bmjopen-2023-081328supp002_data_supplement.pdf [file bmjopen-2023-081328supp002_data_supplement.pdf]

## Sensitivity analysis

| Satisfaction : threshold value of 50% |              |                       |                  | Satisfaction : threshold value of 40% |                    |                  |              | Satisfaction : threshold value of 60% |                  |  |  |
|---------------------------------------|--------------|-----------------------|------------------|---------------------------------------|--------------------|------------------|--------------|---------------------------------------|------------------|--|--|
| Variable                              | OR           | 95% CI                | P value          | OR                                    | 95% CI             | P value          | OR           | 95% CI                                | P value          |  |  |
| Age                                   | 1.006        | 0.985 to 1.027        | 0.596            | 1.055                                 | 0.995 1.042        | 0.125            | 0.998        | 0.977 1.019                           | 0.825            |  |  |
| Gender (Female:1)                     | 0.859        | 0.569 to 1.298        | 0.47             | 0.5                                   | 0.634 1.555        | 0.975            | 0.67         | 0.441 1.018                           | 0.06             |  |  |
| Profession (nurse:1)                  | 0.727        | 0.449 to 1.179        | 0.196            | 0.709                                 | 0.402 1.123        | 0.129            | 0.727        | 0.433 1.222                           | 0.229            |  |  |
| <b>PDS factor</b>                     | <b>1.121</b> | <b>1.076 to 1.167</b> | <b>&lt;0.001</b> | <b>1.057</b>                          | <b>1.076 1.173</b> | <b>&lt;0.001</b> | <b>1.081</b> | <b>1.038 1.125</b>                    | <b>&lt;0.001</b> |  |  |
| <b>Do factor</b>                      | <b>0.955</b> | <b>0.922 to 0.989</b> | <b>0.01</b>      | <b>0.962</b>                          | <b>0.913 0.983</b> | <b>&lt;0.001</b> | <b>0.933</b> | <b>0.899 0.969</b>                    | <b>&lt;0.001</b> |  |  |
| Administrative experience             | 1.602        | 1.070 to 2.400        | 0.022            | 1.469                                 | 1.05 2.521         | 0.029            | <b>1.857</b> | <b>1.226 2.813</b>                    | <b>&lt;0.001</b> |  |  |
| <b>JASSIC</b>                         | <b>1.03</b>  | <b>1.009 to 1.052</b> | <b>0.005</b>     | 1.082                                 | 0.999 1.044        | 0.056            | <b>1.052</b> | <b>1.028 1.077</b>                    | <b>&lt;0.001</b> |  |  |
| Confidence : threshold value of 50%   |              |                       |                  | Confidence : threshold value of 40%   |                    |                  |              | Confidence : threshold value of 60%   |                  |  |  |
| Variable                              | OR           | 95% CI                | P value          | OR                                    | 95% CI             | P value          | OR           | 95% CI                                | P value          |  |  |
| <b>Age</b>                            | <b>1.052</b> | <b>1.028 to 1.076</b> | <b>&lt;0.001</b> | <b>1.055</b>                          | <b>1.027 1.084</b> | <b>&lt;0.001</b> | <b>1.029</b> | <b>1.027 1.084</b>                    | <b>0.008</b>     |  |  |

|                              |              |                   |                  |              |              |              |                  |              |              |              |                  |
|------------------------------|--------------|-------------------|------------------|--------------|--------------|--------------|------------------|--------------|--------------|--------------|------------------|
| <b>Gender</b>                | <b>0.404</b> | <b>0.262 to</b>   | <b>&lt;0.001</b> | <b>0.500</b> | <b>0.304</b> | <b>0.822</b> | <b>&lt;0.001</b> | <b>0.439</b> | <b>0.304</b> | <b>0.822</b> | <b>&lt;0.001</b> |
| <b>(Female:1)</b>            |              | <b>0.623</b>      |                  |              |              |              |                  |              |              |              |                  |
| Profession<br>(nurse:1)      | 1.166        | 0.713 to<br>1.908 | 0.54             | 0.709        | 0.410        | 1.227        | 0.219            | 0.936        | 0.41         | 1.227        | 0.787            |
| PDS factor                   | 1.025        | 0.986 to<br>1.067 | 0.212            | <b>1.057</b> | <b>1.010</b> | <b>1.107</b> | <b>0.016</b>     | 1.014        | 1.01         | 1.107        | 0.473            |
| <b>Do factor</b>             | <b>0.947</b> | <b>0.914 to</b>   | <b>0.003</b>     | 0.962        | 0.923        | 1.003        | 0.067            | <b>0.956</b> | <b>0.923</b> | <b>1.003</b> | <b>0.010</b>     |
|                              |              | <b>0.982</b>      |                  |              |              |              |                  |              |              |              |                  |
| Administrative<br>experience | 1.296        | 0.855 to<br>1.963 | 0.222            | 1.469        | 0.900        | 2.399        | 0.124            | <b>1.757</b> | <b>0.9</b>   | <b>2.399</b> | <b>0.005</b>     |
| <b>JASSIC</b>                | <b>1.074</b> | <b>1.049 to</b>   | <b>&lt;0.001</b> | 1.082        | 1.054        | 1.111        | <b>&lt;0.001</b> | 1.067        | <b>1.054</b> | <b>1.111</b> | <b>&lt;0.001</b> |
|                              |              | <b>1.099</b>      |                  |              |              |              |                  |              |              |              |                  |

\*Binomial logistic analysis of the association with **more satisfaction, and the more confident group about complex issues**. Bold text indicates a statistically significant correlation with a p-value less than 0.17.

OR, odds ratio; CI, confidence interval; JASSIC, Japanese version of the Self-assessment Scale of Interprofessional Competency; PDS factor, “Plan, Do, See” action for management; Do factor, top-down management style, such as in a leader-centered organization
