# Supplementary material for: Exploring factors associated with healthcare professionals’ subjective perceptions of complex issues in primary care in Japan: a self-administered survey study on confidence, satisfaction and burden levels
Source: HighWire-hosted journal article supplement (doi:10.1136/bmjopen-2023-081328), 2024-03-01
Supplement: bmjopen-2023-081328supp004_data_supplement.pdf [file bmjopen-2023-081328supp004_data_supplement.pdf]

**Supplemental Table 1.** Univariate analyses of the association of the subjective perceptions by sociodemographic characteristic

| Characteristic                                                                          | Satisfaction                   |                               |         | Confidence                |                           |         | Burden                    |                           |         |
|-----------------------------------------------------------------------------------------|--------------------------------|-------------------------------|---------|---------------------------|---------------------------|---------|---------------------------|---------------------------|---------|
|                                                                                         | Higher satisfaction<br>(n=359) | Lower satisfaction<br>(n=234) | p-value | More confident<br>(n=388) | Less confident<br>(n=205) | p-value | Heavier burden<br>(n=328) | Lighter burden<br>(n=265) | p-value |
| Mean age (years),<br>Mean (SD)                                                          | 42.5 (10.1)                    | 41.0 (9.9)                    | 0.074   | 43.5 (9.8)                | 38.9 (9.8)                | <0.001  | 42.2 (10.1)               | 41.6 (9.9)                | 0.525   |
| Female, n (%)                                                                           | 176 (49.0)                     | 136 (58.1)                    | 0.030   | 182 (46.9)                | 130 (63.4)                | <0.001  | 170 (51.8)                | 142 (53.6)                | 0.670   |
| Mean years of<br>experience (years),<br>Mean (SD)                                       | 16.6 (9.8)                     | 16.0 (9.6)                    | 0.442   | 17.8 (9.8)                | 13.7 (8.9)                | <0.001  | 16.6 (9.5)                | 16.2 (9.9)                | 0.601   |
| Mean years of<br>experience working at<br>the current institution<br>(years), Mean (SD) | 9.4 (8.6)                      | 8.9 (7.8)                     | 0.556   | 9.6 (8.7)                 | 8.4 (7.4)                 | 0.098   | 9.5 (8.5)                 | 8.8 (7.9)                 | 0.269   |
| Attendance type<br>(regular), n (%)                                                     | 336 (93.6)                     | 221 (94.4)                    | 0.671   | 365 (94.1)                | 192 (93.7)                | 0.841   | 307 (93.6)                | 250 (94.3)                | 0.707   |

|                                          |            |             |        |            |             |        |            |            |       |
|------------------------------------------|------------|-------------|--------|------------|-------------|--------|------------|------------|-------|
| Administrative experience (yes), n (%)   | 210 (58.5) | 94 (40.2)   | <0.001 | 228 (58.8) | 76 (37.1)   | <0.001 | 161 (49.1) | 143 (54.0) | 0.237 |
| <b>Profession (including duplicates)</b> |            |             |        |            |             |        |            |            |       |
| Public health nurses and nurses, n (%)   | 70 (19.5)  | 63 (26.9)   | 0.034  | 83 (21.4)  | 50 (24.4)   | 0.405  | 79 (24.1)  | 54 (20.4)  | 0.282 |
| <b>Total JASSIC score</b>                |            |             |        |            |             |        |            |            |       |
| Mean (SD)                                | 73.6 (8.9) | 68.2 (10.3) | <0.001 | 74.0 (8.6) | 66.6 (10.2) | <0.001 | 71.4 (9.9) | 71.5 (9.8) | 0.857 |
| <b>PDS Factor</b>                        |            |             |        |            |             |        |            |            |       |
| Mean (SD)                                | 33.5 (5.7) | 28.8 (5.3)  | <0.001 | 32.7 (6.0) | 29.6 (5.6)  | <0.001 | 31.7 (6.0) | 31.5 (6.1) | 0.702 |
| <b>Do Factor</b>                         |            |             |        |            |             |        |            |            |       |
| Mean (SD)                                | 25.2 (5.9) | 29.1 (6.4)  | <0.001 | 25.8 (6.4) | 28.5 (6.1)  | <0.001 | 26.6 (6.5) | 26.9 (6.3) | 0.640 |

Abbreviations: SD, standard deviation. JASSIC, Japanese version of the Self-assessment Scale of Interprofessional Competency; PDS factor, “Plan, Do, See” action for management; Do factor, top-down ordering of work, such as in a leader-centered organization.
